# Supplementary material
Source: Springer Nature journal article supplement (https://www.springermedizin.de/resource/supplementary/12865_2008_224_MOESM5_ESM.pdf/9427624)
Supplement: MOESM5 [file 9427624]

Cyclophilin

SAA

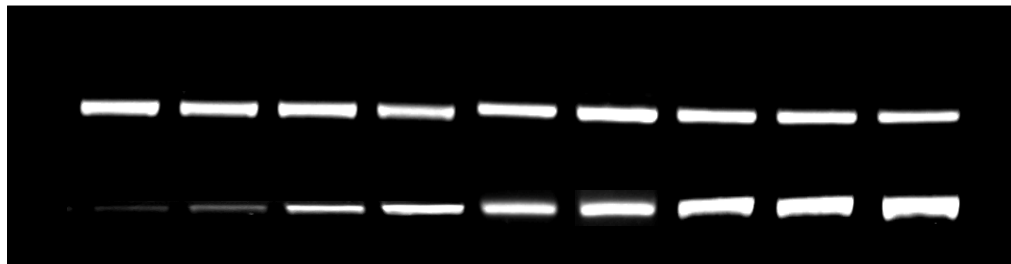

Virgin

50

80

111

1

3

7

14

20

Pregnancy (day)

Lactation (day)

Relative SAA mRNA expression levels (Log)

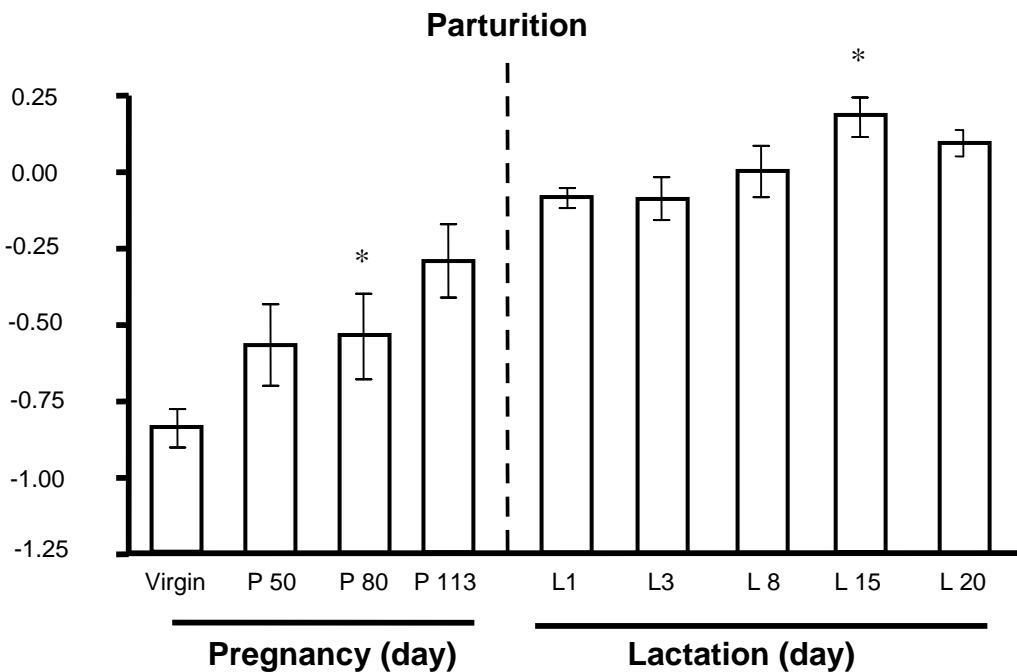

Parturition

Virgin

P 50

P 80

P 113

L 1

L 3

L 8

L 15

L 20

Pregnancy (day)

Lactation (day)
